# Supplementary material for: TRIM29 mediates lung squamous cell carcinoma cell metastasis by regulating autophagic degradation of E-cadherin
Source: publisher site journal article supplement (doi:10.18632/aging.103451), 2020-07-08
Supplement: Supplementary file [file aging-v12i13-103451-supplementary-material-SD1.pdf]

## SUPPLEMENTARY FIGURE

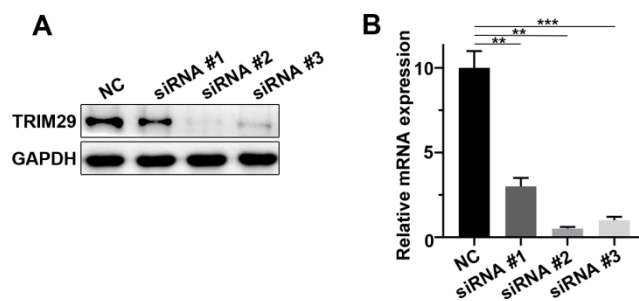

**Supplementary Figure 1. The siRNA information of TRIM29.** (A) Validation of TRIM29 siRNA by western blot; (B) Validation of TRIM29 siRNA by qRT-PCR.
